# Supplementary material for: History of primary-series and booster vaccination and protection against Omicron reinfection
Source: PubMed Central journal article supplement (PMC10550237; doi:10.1126/sciadv.adh0761), 2023-10-04
Supplement: sciadv.adh0761_sm.pdf [file sciadv.adh0761_sm.pdf]

Supplementary Materials for  
**History of primary-series and booster vaccination and protection against  
Omicron reinfection**

Hiam Chemaitelly *et al.*

Corresponding author: Hiam Chemaitelly, [hsc2001@qatar-med.cornell.edu](mailto:hsc2001@qatar-med.cornell.edu);

Laith J. Abu-Raddad, [lja2002@qatar-med.cornell.edu](mailto:lja2002@qatar-med.cornell.edu)

*Sci. Adv.* **9**, eadh0761 (2023)  
DOI: 10.1126/sciadv.adh0761

**This PDF file includes:**

Figs. S1 to S5  
Tables S1 to S3

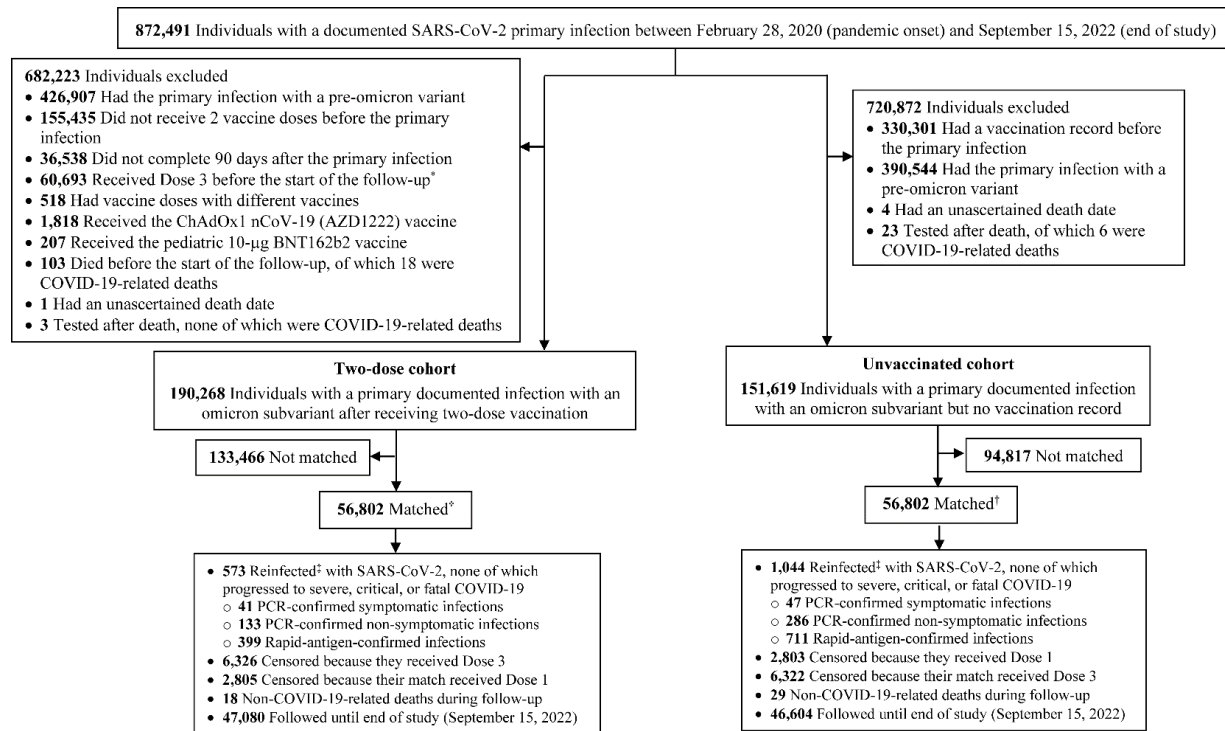

COVID-19 denotes coronavirus disease 2019, PCR polymerase chain reaction, and SARS-CoV-2 severe acute respiratory syndrome coronavirus 2.

\*Each matched pair was followed from 90 days after the primary omicron infection of the individual in the two-dose cohort.

†Cohorts were matched exactly one-to-one by sex, age, nationality, number of coexisting conditions, as well as SARS-CoV-2 testing method, reason for SARS-CoV-2 testing, and calendar week of the SARS-CoV-2 test of the primary omicron infection.

‡SARS-CoV-2 reinfection was defined as a documented infection  $\geq 90$  days after an earlier infection.

**Fig. S1. Flowchart describing the population selection process for investigating immune protection against reinfection among those who had a primary infection with an omicron subvariant after two-dose vaccination compared to protection among those who had a primary infection with an omicron subvariant but were unvaccinated.**

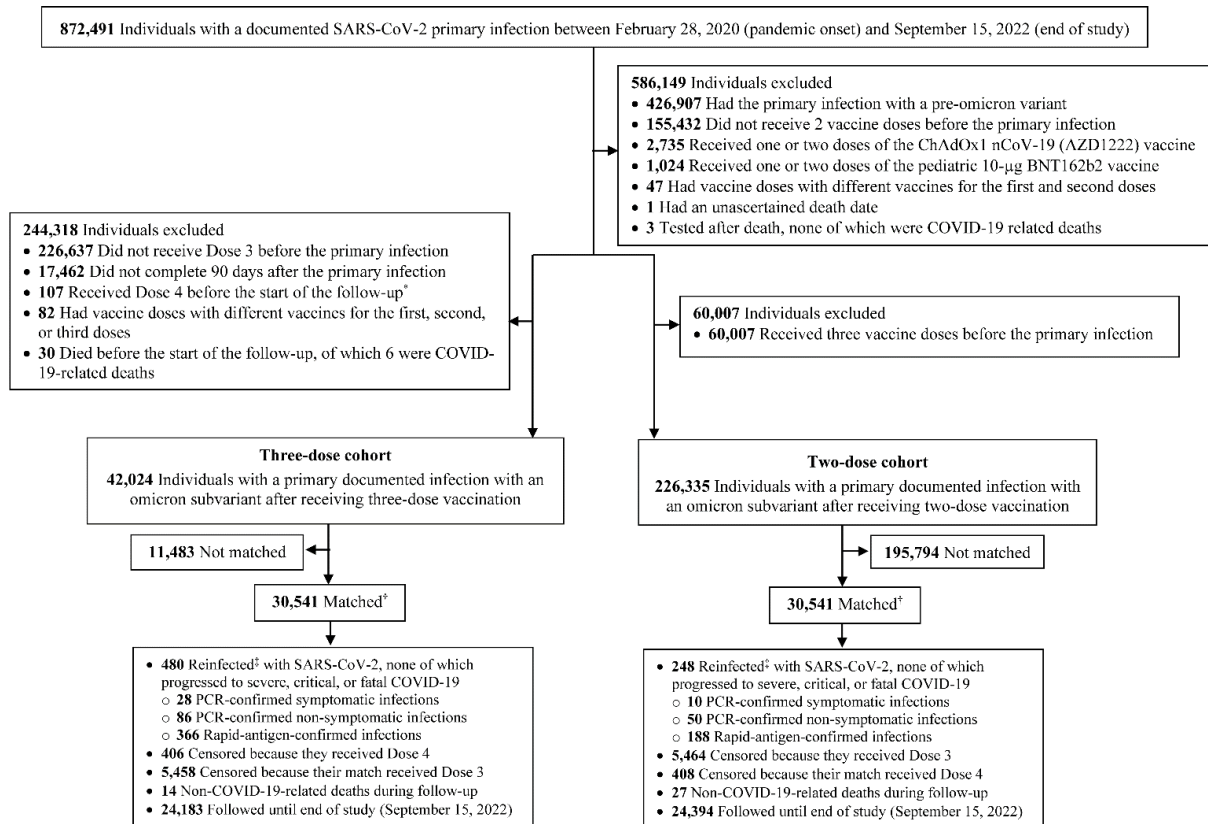

COVID-19 denotes coronavirus disease 2019, PCR polymerase chain reaction, and SARS-CoV-2 severe acute respiratory syndrome coronavirus 2.

<sup>†</sup>Each matched pair was followed from 90 days after the primary omicron infection of the individual in the three-dose cohort.

<sup>‡</sup>Cohorts were matched exactly one-to-one by sex, age, nationality, number of coexisting conditions, as well as SARS-CoV-2 testing method, reason for SARS-CoV-2 testing, and calendar week of the SARS-CoV-2 test of the primary omicron infection.

<sup>§</sup>SARS-CoV-2 reinfection was defined as a documented infection  $\geq 90$  days after an earlier infection.

**Fig. S2. Flowchart describing the population selection process for investigating immune protection against reinfection among those who had a primary infection with an omicron subvariant after three-dose vaccination compared to protection among those who had a primary infection with an omicron subvariant after two-dose vaccination.**

**Table S1. Sensitivity analyses. Hazard ratios for incidence of SARS-CoV-2 reinfection in the study investigating immune protection among those who had a primary infection with an omicron subvariant after three-dose vaccination compared to two-dose vaccination.**

| Epidemiological measure                                                                                                  | Cohorts             |                  |
|--------------------------------------------------------------------------------------------------------------------------|---------------------|------------------|
|                                                                                                                          | Three-dose cohort   | Two-dose cohort  |
| <b>A) Matching by Charlson comorbidity index score<sup>a</sup></b>                                                       |                     |                  |
| Sample size                                                                                                              | 29,508              | 29,508           |
| Incident reinfections (n)                                                                                                | 478                 | 236              |
| Total follow-up time (person-weeks)                                                                                      | 566,587             | 568,088          |
| Incidence rate of reinfection (per 10,000 person-weeks; 95% CI)                                                          | 8.4 (7.7 to 9.2)    | 4.2 (3.7 to 4.7) |
| Unadjusted hazard ratio for SARS-CoV-2 reinfection (95% CI)                                                              | 2.04 (1.74 to 2.38) |                  |
| Adjusted hazard ratio for SARS-CoV-2 reinfection (95% CI) <sup>b</sup>                                                   | 1.99 (1.67 to 2.39) |                  |
| Hazard ratio for SARS-CoV-2 reinfection additionally adjusted for differences in testing frequency (95% CI) <sup>b</sup> | 1.39 (1.16 to 1.67) |                  |
| <b>B) Matching by primary-series vaccine type<sup>c</sup></b>                                                            |                     |                  |
| Sample size                                                                                                              | 28,357              | 28,357           |
| Incident reinfections (n)                                                                                                | 453                 | 243              |
| Total follow-up time (person-weeks)                                                                                      | 546,890             | 548,008          |
| Incidence rate of reinfection (per 10,000 person-weeks; 95% CI)                                                          | 8.3 (7.6 to 9.1)    | 4.4 (3.9 to 5.0) |
| Unadjusted hazard ratio for SARS-CoV-2 reinfection (95% CI)                                                              | 1.87 (1.60 to 2.19) |                  |
| Adjusted hazard ratio for SARS-CoV-2 reinfection (95% CI) <sup>d</sup>                                                   | 1.94 (1.62 to 2.33) |                  |
| Hazard ratio for SARS-CoV-2 reinfection additionally adjusted for differences in testing frequency (95% CI) <sup>d</sup> | 1.43 (1.19 to 1.71) |                  |
| <b>Cohorts who received BNT162b2 primary series</b>                                                                      |                     |                  |
| Sample size                                                                                                              | 23,533              | 23,533           |
| Incident reinfections (n)                                                                                                | 405                 | 223              |
| Total follow-up time (person-weeks)                                                                                      | 456,085             | 457,065          |
| Incidence rate of reinfection (per 10,000 person-weeks; 95% CI)                                                          | 8.9 (8.1 to 9.8)    | 4.9 (4.3 to 5.6) |
| Unadjusted hazard ratio for SARS-CoV-2 reinfection (95% CI)                                                              | 1.82 (1.55 to 2.15) |                  |
| Adjusted hazard ratio for SARS-CoV-2 reinfection (95% CI)                                                                | 1.89 (1.56 to 2.29) |                  |
| Hazard ratio for SARS-CoV-2 reinfection additionally adjusted for differences in testing frequency (95% CI)              | 1.39 (1.15 to 1.68) |                  |
| <b>Cohorts who received mRNA-1273 primary series</b>                                                                     |                     |                  |
| Sample size                                                                                                              | 4,804               | 4,804            |
| Incident reinfections (n)                                                                                                | 48                  | 20               |
| Total follow-up time (person-weeks)                                                                                      | 90,805              | 90,943           |
| Incidence rate of reinfection (per 10,000 person-weeks; 95% CI)                                                          | 5.3 (4.0 to 7.0)    | 2.2 (1.4 to 3.4) |
| Unadjusted hazard ratio for SARS-CoV-2 reinfection (95% CI)                                                              | 2.41 (1.43 to 4.06) |                  |
| Adjusted hazard ratio for SARS-CoV-2 reinfection (95% CI)                                                                | 2.45 (1.37 to 4.39) |                  |
| Hazard ratio for SARS-CoV-2 reinfection additionally adjusted for differences in testing frequency (95% CI)              | 1.83 (1.03 to 3.28) |                  |

CI denotes confidence interval and SARS-CoV-2 severe acute respiratory syndrome coronavirus 2.

<sup>a</sup>Cohorts were matched exactly one-to-one by sex, age, nationality, Charlson comorbidity index, as well as SARS-CoV-2 testing method, reason for SARS-CoV-2 testing, and calendar week of the SARS-CoV-2 test of the primary omicron infection.

<sup>b</sup>Cox regression analysis adjusted for sex, 10-year age groups, 10 nationality groups, Charlson comorbidity index, as well as SARS-CoV-2 testing method, reason for SARS-CoV-2 testing, and calendar week of the SARS-CoV-2 test of the primary omicron infection.

<sup>c</sup>Cohorts were matched exactly one-to-one by sex, age, nationality, number of coexisting conditions, primary-series vaccine type (two doses of BNT162b2 or two doses of mRNA-1273), as well as SARS-CoV-2 testing method, reason for SARS-CoV-2 testing, and calendar week of the SARS-CoV-2 test of the primary omicron infection.

<sup>d</sup>Cox regression analysis adjusted for sex, 10-year age groups, 10 nationality groups, number of coexisting conditions, primary-series vaccine type, as well as SARS-CoV-2 testing method, reason for SARS-CoV-2 testing, and calendar week of the SARS-CoV-2 test of the primary omicron infection.

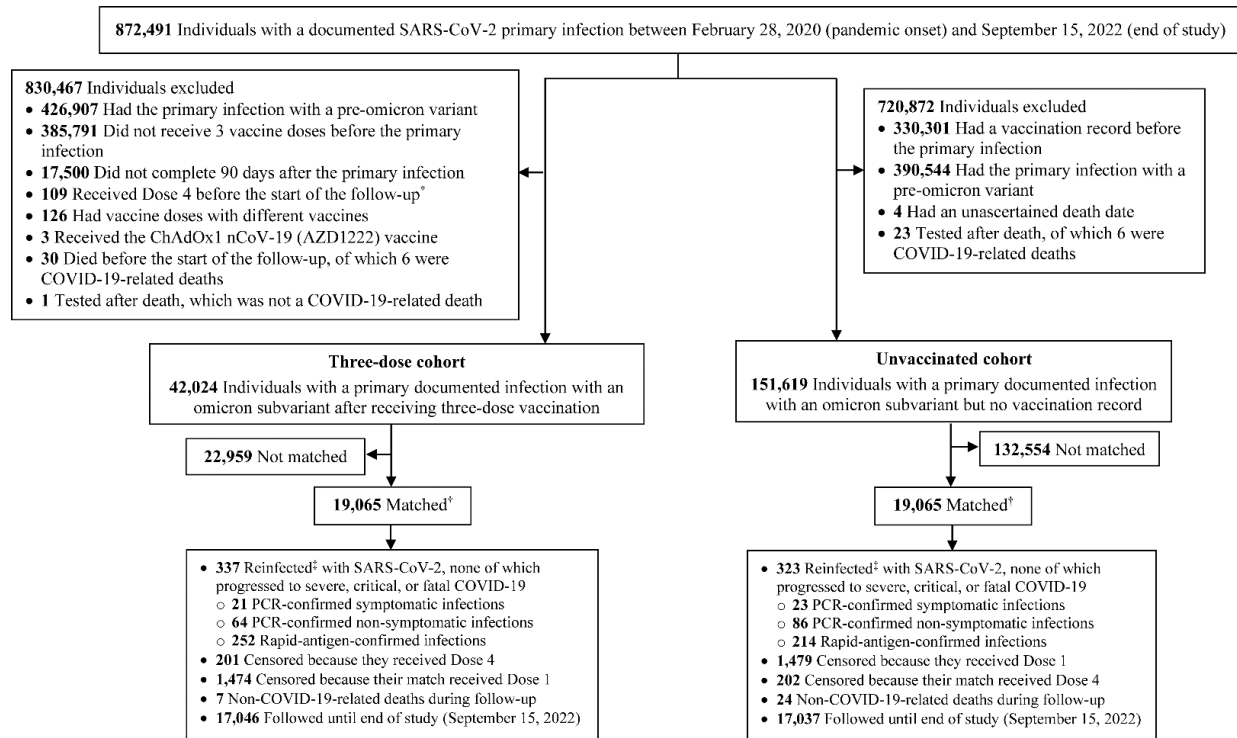

COVID-19 denotes coronavirus disease 2019, PCR polymerase chain reaction, and SARS-CoV-2 severe acute respiratory syndrome coronavirus 2.

†Each matched pair was followed from 90 days after the primary omicron infection of the individual in the three-dose cohort.

‡Cohorts were matched exactly one-to-one by sex, age, nationality, number of coexisting conditions, as well as SARS-CoV-2 testing method, reason for SARS-CoV-2 testing, and calendar week of the SARS-CoV-2 test of the primary omicron infection.

§SARS-CoV-2 reinfection was defined as a documented infection ≥90 days after an earlier infection.

**Fig. S3. Flowchart describing the population selection process for investigating immune protection against reinfection among those who had a primary infection with an omicron subvariant after three-dose vaccination compared to protection among those who had a primary infection with an omicron subvariant but were unvaccinated.**

**Table S2. Baseline characteristics of eligible and matched cohorts in the study investigating immune protection against reinfection among those who had a primary infection with an omicron subvariant after three-dose vaccination compared to those who had a primary infection with an omicron subvariant but were unvaccinated.**

| Characteristics <sup>a</sup>     | Full eligible cohorts |                     |                   | Matched cohorts <sup>b</sup> |                     |                   |
|----------------------------------|-----------------------|---------------------|-------------------|------------------------------|---------------------|-------------------|
|                                  | Three-dose cohort     | Unvaccinated cohort | SMD <sup>c</sup>  | Three-dose cohort            | Unvaccinated cohort | SMD <sup>c</sup>  |
|                                  | N=42,024              | N=151,619           |                   | N=19,065                     | N=19,065            |                   |
| Median age (IQR)—years           | 40 (34-49)            | 22 (7-34)           | 1.39 <sup>d</sup> | 37 (31-44)                   | 36 (31-44)          | 0.04 <sup>d</sup> |
| Age—years                        |                       |                     |                   |                              |                     |                   |
| 0-9 years                        | 1 (<0.01)             | 50,360 (33.2)       |                   | 1 (0.01)                     | 1 (0.01)            |                   |
| 10-19 years                      | 828 (2.0)             | 21,980 (14.5)       |                   | 449 (2.4)                    | 449 (2.4)           |                   |
| 20-29 years                      | 4,234 (10.1)          | 28,134 (18.6)       |                   | 3,104 (16.3)                 | 3,104 (16.3)        |                   |
| 30-39 years                      | 14,982 (35.7)         | 29,247 (19.3)       | 1.50              | 8,245 (43.3)                 | 8,245 (43.3)        | 0.00              |
| 40-49 years                      | 11,652 (27.7)         | 13,527 (8.9)        |                   | 4,675 (24.5)                 | 4,675 (24.5)        |                   |
| 50-59 years                      | 6,680 (15.9)          | 5,146 (3.4)         |                   | 1,764 (9.3)                  | 1,764 (9.3)         |                   |
| 60-69 years                      | 2,691 (6.4)           | 2,127 (1.4)         |                   | 612 (3.2)                    | 612 (3.2)           |                   |
| 70+ years                        | 956 (2.3)             | 1,098 (0.7)         |                   | 215 (1.1)                    | 215 (1.1)           |                   |
| Sex                              |                       |                     |                   |                              |                     |                   |
| Male                             | 23,930 (56.9)         | 83,294 (54.9)       | 0.02              | 10,354 (54.3)                | 10,354 (54.3)       | 0.00              |
| Female                           | 18,094 (43.1)         | 68,325 (45.1)       |                   | 8,711 (45.7)                 | 8,711 (45.7)        |                   |
| Nationality <sup>e</sup>         |                       |                     |                   |                              |                     |                   |
| Bangladeshi                      | 1,025 (2.4)           | 2,548 (1.7)         |                   | 470 (2.5)                    | 470 (2.5)           |                   |
| Egyptian                         | 2,547 (6.1)           | 7,561 (5.0)         |                   | 763 (4.0)                    | 763 (4.0)           |                   |
| Filipino                         | 7,835 (18.6)          | 10,505 (6.9)        |                   | 3,648 (19.1)                 | 3,648 (19.1)        |                   |
| Indian                           | 10,734 (25.5)         | 31,281 (20.6)       |                   | 5,992 (31.4)                 | 5,992 (31.4)        |                   |
| Nepalese                         | 696 (1.7)             | 6,673 (4.4)         | 0.48              | 540 (2.8)                    | 540 (2.8)           | 0.00              |
| Pakistani                        | 1,005 (2.4)           | 6,412 (4.2)         |                   | 409 (2.2)                    | 409 (2.2)           |                   |
| Qatari                           | 6,145 (14.6)          | 37,165 (24.5)       |                   | 3,591 (18.8)                 | 3,591 (18.8)        |                   |
| Sri Lankan                       | 781 (1.9)             | 2,602 (1.7)         |                   | 363 (1.9)                    | 363 (1.9)           |                   |
| Sudanese                         | 880 (2.1)             | 3,690 (2.4)         |                   | 316 (1.7)                    | 316 (1.7)           |                   |
| Other nationalities <sup>f</sup> | 10,376 (24.7)         | 43,182 (28.5)       |                   | 2,973 (15.6)                 | 2,973 (15.6)        |                   |
| Coexisting conditions            |                       |                     |                   |                              |                     |                   |
| None                             | 26,945 (64.1)         | 124,701 (82.3)      |                   | 16,026 (84.1)                | 16,026 (84.1)       |                   |
| 1                                | 6,200 (14.8)          | 19,358 (12.8)       | 0.53              | 1,420 (7.5)                  | 1,420 (7.5)         | 0.00              |
| 2                                | 3,751 (8.9)           | 4,940 (3.3)         |                   | 619 (3.3)                    | 619 (3.3)           |                   |
| 3+                               | 5,128 (12.2)          | 2,620 (1.7)         |                   | 1,000 (5.3)                  | 1,000 (5.3)         |                   |
| Testing method <sup>g</sup>      |                       |                     |                   |                              |                     |                   |
| PCR                              | 26,019 (61.9)         | 91,509 (60.4)       | 0.03              | 13,197 (69.2)                | 13,197 (69.2)       | 0.00              |
| RA                               | 16,005 (38.1)         | 60,110 (39.7)       |                   | 5,868 (30.8)                 | 5,868 (30.8)        |                   |
| Reason for testing <sup>h</sup>  |                       |                     |                   |                              |                     |                   |
| Clinical suspicion               | 7,711 (18.4)          | 22,817 (15.1)       |                   | 3,334 (17.5)                 | 3,334 (17.5)        |                   |
| Contact tracing                  | 4,432 (10.6)          | 17,653 (11.6)       |                   | 1,702 (8.9)                  | 1,702 (8.9)         |                   |
| Survey                           | 2,604 (6.2)           | 7,277 (4.8)         |                   | 1,088 (5.7)                  | 1,088 (5.7)         |                   |
| Individual request               | 2,969 (7.1)           | 9,342 (6.2)         |                   | 1,212 (6.4)                  | 1,212 (6.4)         |                   |
| Healthcare routine testing       | 943 (2.2)             | 2,426 (1.6)         | 0.38              | 180 (0.9)                    | 180 (0.9)           | 0.00              |
| Pre-travel                       | 9,836 (23.4)          | 24,782 (16.3)       |                   | 6,299 (33.0)                 | 6,299 (33.0)        |                   |
| Port of entry                    | 1,883 (4.5)           | 21,244 (14.0)       |                   | 653 (3.4)                    | 653 (3.4)           |                   |
| Other                            | 105 (0.3)             | 374 (0.3)           |                   | 3 (0.02)                     | 3 (0.02)            |                   |
| Not specified                    | 11,541 (27.5)         | 45,704 (30.1)       |                   | 4,594 (24.1)                 | 4,594 (24.1)        |                   |

IQR denotes interquartile range, PCR, polymerase chain reaction, RA, rapid antigen, SARS-CoV-2 severe acute respiratory syndrome coronavirus 2, and SMD standardized mean difference.

<sup>a</sup>These characteristics are ascertained at the start of follow-up of the study cohorts.

<sup>b</sup>Cohorts were matched exactly one-to-one by sex, age, nationality, number of coexisting conditions, as well as SARS-CoV-2 testing method, reason for SARS-CoV-2 testing, and calendar week of the SARS-CoV-2 test of the primary omicron infection.

<sup>c</sup>SMD is the difference in the mean of a covariate between groups divided by the pooled standard deviation. An SMD  $\leq 0.1$  indicates adequate matching.

<sup>d</sup>SMD is for the mean difference between groups divided by the pooled standard deviation.

<sup>e</sup>Nationalities were chosen to represent the most populous groups in Qatar.

<sup>f</sup>These comprise up to 157 other nationalities in the unmatched cohorts, and 73 other nationalities in the matched cohorts.

<sup>g</sup>The testing method that was used to ascertain the omicron infection that made the person eligible for inclusion in the cohort.

<sup>h</sup>The reason for testing of the SARS-CoV-2 test that ascertained the omicron infection that made the person eligible for inclusion in the cohort.

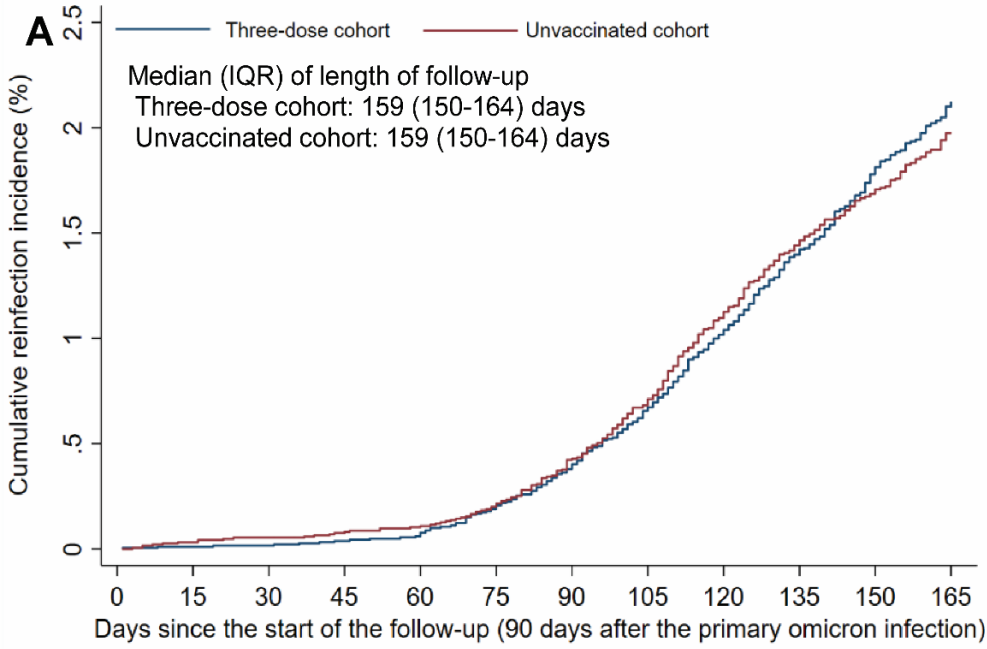

| Time (days)         | 0      | 15     | 30     | 45     | 60     | 75     | 90     | 105    | 120    | 135    | 150    | 165   |
|---------------------|--------|--------|--------|--------|--------|--------|--------|--------|--------|--------|--------|-------|
| No. at risk         |        |        |        |        |        |        |        |        |        |        |        |       |
| Three-dose cohort   | 19,065 | 18,509 | 18,216 | 17,933 | 17,739 | 17,559 | 17,365 | 17,164 | 16,823 | 16,263 | 14,395 | 4,576 |
| Unvaccinated cohort | 19,065 | 18,507 | 18,209 | 17,924 | 17,725 | 17,545 | 17,346 | 17,148 | 16,800 | 16,242 | 14,391 | 4,593 |

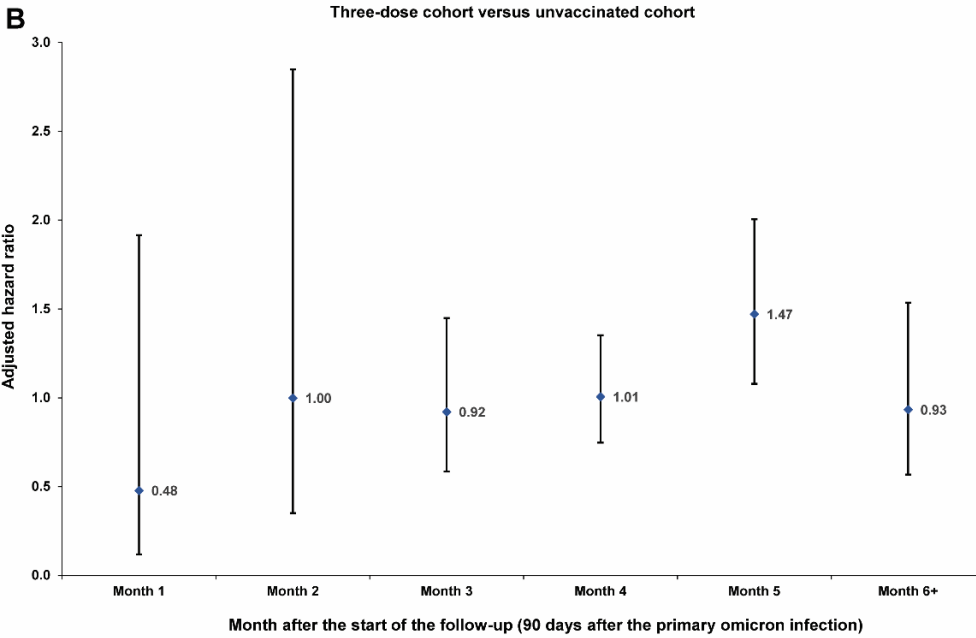

IQR denotes interquartile range

**Fig. S4. A) Cumulative incidence of and B) adjusted hazard ratio by month of follow-up for SARS-CoV-2 reinfection among those who had a primary infection with an omicron subvariant after three-dose vaccination compared to those who had a primary infection with an omicron subvariant but were unvaccinated. Error bars indicate confidence intervals.**

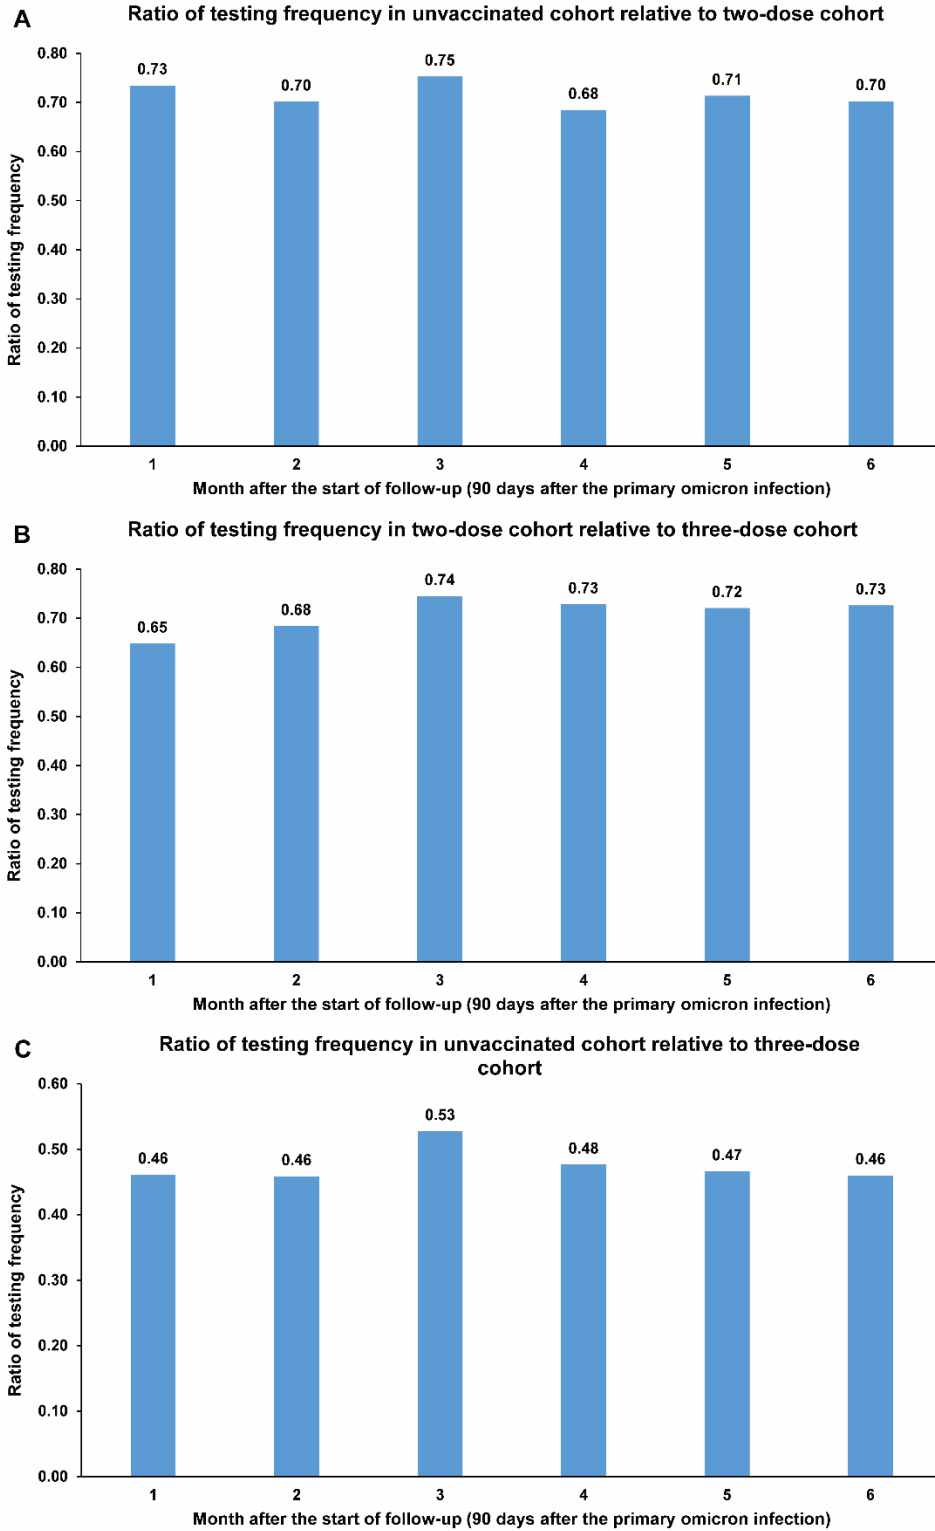

**Fig. S5. Ratio of testing frequency in the matched cohorts of studies investigating immune protection among those who had a primary infection with an omicron subvariant, but different vaccination histories.**



**Table S3. STROBE checklist for cohort studies.**

|                           | Item No | Recommendation                                                                                                                                                                                                                                                                                  | Main Text page                                                                                                                                                                                                                           |
|---------------------------|---------|-------------------------------------------------------------------------------------------------------------------------------------------------------------------------------------------------------------------------------------------------------------------------------------------------|------------------------------------------------------------------------------------------------------------------------------------------------------------------------------------------------------------------------------------------|
| <b>Title and abstract</b> | 1       | (a) Indicate the study's design with a commonly used term in the title or the abstract                                                                                                                                                                                                          | Abstract                                                                                                                                                                                                                                 |
|                           |         | (b) Provide in the abstract an informative and balanced summary of what was done and what was found                                                                                                                                                                                             | Abstract                                                                                                                                                                                                                                 |
| <b>Introduction</b>       |         |                                                                                                                                                                                                                                                                                                 |                                                                                                                                                                                                                                          |
| Background/rationale      | 2       | Explain the scientific background and rationale for the investigation being reported                                                                                                                                                                                                            | Introduction                                                                                                                                                                                                                             |
| Objectives                | 3       | State specific objectives, including any prespecified hypotheses                                                                                                                                                                                                                                | Introduction                                                                                                                                                                                                                             |
| <b>Methods</b>            |         |                                                                                                                                                                                                                                                                                                 |                                                                                                                                                                                                                                          |
| Study design              | 4       | Present key elements of study design early in the paper                                                                                                                                                                                                                                         | Introduction (paragraph 4) & Materials & Methods ('Study design and cohorts' & 'Cohort matching and follow-up')                                                                                                                          |
| Setting                   | 5       | Describe the setting, locations, and relevant dates, including periods of recruitment, exposure, follow-up, and data collection                                                                                                                                                                 | Materials & Methods ('Study population and data sources', 'Study design and cohorts' & 'Cohort matching and follow-up', & Figs. S1-S3                                                                                                    |
| Participants              | 6       | (a) Give the eligibility criteria, and the sources and methods of selection of participants. Describe methods of follow-up<br>(b) For matched studies, give matching criteria and number of exposed and unexposed                                                                               | Materials & Methods ('Study design and cohorts' & 'Cohort matching and follow-up', & Figs. S1-S3                                                                                                                                         |
| Variables                 | 7       | Clearly define all outcomes, exposures, predictors, potential confounders, and effect modifiers. Give diagnostic criteria, if applicable                                                                                                                                                        | Materials & Methods ('Study design and cohorts' & 'Cohort matching and follow-up', 'Comorbidity classification', 'Laboratory methods', 'COVID-19 severity, criticality, and fatality classification'), Table 1, & Table S2               |
| Data sources/measurement  | 8*      | For each variable of interest, give sources of data and details of methods of assessment (measurement). Describe comparability of assessment methods if there is more than one group                                                                                                            | Materials & Methods ('Study population and data sources', 'Comorbidity classification', 'Laboratory methods', 'COVID-19 severity, criticality, and fatality classification', & 'Statistical analysis', paragraph 1), Table 1, & Table S2 |
| Bias                      | 9       | Describe any efforts to address potential sources of bias                                                                                                                                                                                                                                       | Materials & Methods ('Cohort matching and follow-up' & 'Statistical analysis', paragraph 2)                                                                                                                                              |
| Study size                | 10      | Explain how the study size was arrived at                                                                                                                                                                                                                                                       | Figs. S1-S3                                                                                                                                                                                                                              |
| Quantitative variables    | 11      | Explain how quantitative variables were handled in the analyses. If applicable, describe which groupings were chosen and why                                                                                                                                                                    | Materials & Methods ('Cohort matching and follow-up' & 'Statistical analysis', paragraph 2), Table 1, & Table S2                                                                                                                         |
| Statistical methods       | 12      | (a) Describe all statistical methods, including those used to control for confounding                                                                                                                                                                                                           | Materials & Methods ('Statistical analysis')                                                                                                                                                                                             |
|                           |         | (b) Describe any methods used to examine subgroups and interactions                                                                                                                                                                                                                             | Materials & Methods ('Statistical analysis', paragraphs 2-4)                                                                                                                                                                             |
|                           |         | (c) Explain how missing data were addressed                                                                                                                                                                                                                                                     | Not applicable, see Materials & Methods ('Study population and data sources')                                                                                                                                                            |
|                           |         | (d) If applicable, explain how loss to follow-up was addressed                                                                                                                                                                                                                                  | Not applicable, see Materials & Methods ('Study population and data sources')                                                                                                                                                            |
|                           |         | (e) Describe any sensitivity analyses                                                                                                                                                                                                                                                           | Materials & Methods ('Statistical analysis', paragraph 3)                                                                                                                                                                                |
| <b>Results</b>            |         |                                                                                                                                                                                                                                                                                                 |                                                                                                                                                                                                                                          |
| Participants              | 13*     | (a) Report numbers of individuals at each stage of study—eg numbers potentially eligible, examined for eligibility, confirmed eligible, included in the study, completing follow-up, and analysed<br>(b) Give reasons for non-participation at each stage<br>(c) Consider use of a flow diagram | Figs. S1-S3                                                                                                                                                                                                                              |
| Descriptive data          | 14      | (a) Give characteristics of study participants (eg demographic, clinical, social) and information on exposures and potential confounders                                                                                                                                                        | Results ('Two-dose cohort versus unvaccinated cohort', paragraphs 1 & 2, 'Three-dose cohort versus two-dose cohort', paragraphs 1 & 2, & 'Three-dose cohort versus unvaccinated cohort', paragraph 1), Table 1, & Table S2               |

|                          |    |                                                                                                                                                                                                              |                                                                                                                                                                                                                                         |
|--------------------------|----|--------------------------------------------------------------------------------------------------------------------------------------------------------------------------------------------------------------|-----------------------------------------------------------------------------------------------------------------------------------------------------------------------------------------------------------------------------------------|
|                          |    | (b) Indicate number of participants with missing data for each variable of interest                                                                                                                          | Not applicable, see Materials & Methods ('Study population and data sources')                                                                                                                                                           |
|                          |    | (c) Summarise follow-up time (eg, average and total amount)                                                                                                                                                  | Results ('Two-dose cohort versus unvaccinated cohort', paragraph 2, & 'Three-dose cohort versus two-dose cohort', paragraph 2), Fig. 1, Table 2, & Fig. S4A                                                                             |
| Outcome data             | 15 | Report numbers of outcome events or summary measures over time                                                                                                                                               | Results ('Two-dose cohort versus unvaccinated cohort', paragraphs 3 & 4, 'Three-dose cohort versus two-dose cohort', paragraphs 3 & 4, & 'Three-dose cohort versus unvaccinated cohort', paragraph 2), Fig. 1, Table 2, & Fig. S4       |
| Main results             | 16 | (a) Give unadjusted estimates and, if applicable, confounder-adjusted estimates and their precision (eg, 95% confidence interval). Make clear which confounders were adjusted for and why they were included | Results ('Two-dose cohort versus unvaccinated cohort', paragraphs 3 & 4, 'Three-dose cohort versus two-dose cohort', paragraphs 3 & 4, & 'Three-dose cohort versus unvaccinated cohort', paragraph 2), Fig. 1, Table 2, & Fig. S4       |
|                          |    | (b) Report category boundaries when continuous variables were categorized                                                                                                                                    | Table 1 & Table S2                                                                                                                                                                                                                      |
|                          |    | (c) If relevant, consider translating estimates of relative risk into absolute risk for a meaningful time period                                                                                             | Not applicable                                                                                                                                                                                                                          |
| Other analyses           | 17 | Report other analyses done—eg analyses of subgroups and interactions, and sensitivity analyses                                                                                                               | Results ('Two-dose cohort versus unvaccinated cohort', paragraph 4, 'Three-dose cohort versus two-dose cohort', paragraphs 4-6, & 'Three-dose cohort versus unvaccinated cohort', paragraph 2-3), Fig. 2, Table S1, Fig. S4B, & Fig. S5 |
| <b>Discussion</b>        |    |                                                                                                                                                                                                              |                                                                                                                                                                                                                                         |
| Key results              | 18 | Summarise key results with reference to study objectives                                                                                                                                                     | Discussion, paragraphs 1-10                                                                                                                                                                                                             |
| Limitations              | 19 | Discuss limitations of the study, taking into account sources of potential bias or imprecision. Discuss both direction and magnitude of any potential bias                                                   | Discussion, paragraphs 11-16                                                                                                                                                                                                            |
| Interpretation           | 20 | Give a cautious overall interpretation of results considering objectives, limitations, multiplicity of analyses, results from similar studies, and other relevant evidence                                   | Discussion, paragraph 17                                                                                                                                                                                                                |
| Generalisability         | 21 | Discuss the generalisability (external validity) of the study results                                                                                                                                        | Discussion, paragraphs 11-16                                                                                                                                                                                                            |
| <b>Other information</b> |    |                                                                                                                                                                                                              |                                                                                                                                                                                                                                         |
| Funding                  | 22 | Give the source of funding and the role of the funders for the present study and, if applicable, for the original study on which the present article is based                                                | Funding                                                                                                                                                                                                                                 |
